# Supplementary material for: Synthesis of anatase-free nano-sized hierarchical TS-1 zeolites and their excellent catalytic performance in alkene epoxidation
Source: Royal Society of Chemistry journal article supplement (doi:10.1039/c8ta01439f), 2018-01-01
Supplement: c8ta01439f1.pdf [file c8ta01439f1.pdf]

## **Electronic Supplementary Information (ESI)**

### **Synthesis of anatase-free nano-sized hierarchical TS-1 zeolite and its excellent catalytic performance in alkenes epoxidation**

Tianjun Zhang,<sup>a</sup> Xiaoxin Chen,<sup>a</sup> Guangrui Chen,<sup>a</sup> Mengyang Chen,<sup>a</sup> Risheng Bai,<sup>a</sup>  
Mingjun Jia<sup>c</sup> and Jihong Yu<sup>\*ab</sup>

<sup>a</sup> State Key Laboratory of Inorganic Synthesis and Preparative Chemistry,  
College of Chemistry, Jilin University, Changchun 130012, P. R. China.

<sup>b</sup> International Center of Future Science, Jilin University, 2699 Qianjin  
Street, Changchun 130012, P. R. China.

<sup>c</sup> Key Laboratory of Surface and Interface Chemistry of Jilin Province,  
College of Chemistry, Jilin University, Changchun 130012, P. R. China.

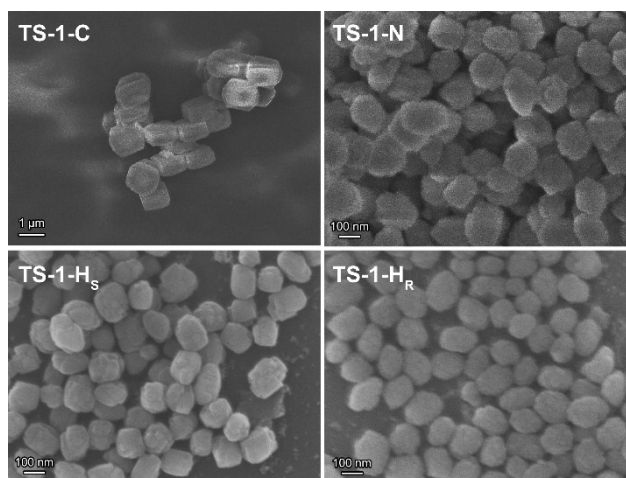

Fig. S1 SEM images of microporous TS-1 (TS-1-C and TS-1-N) and nano-sized hierarchical TS-1 (TS-1-H<sub>S</sub> and TS-1-H<sub>R</sub>).

Table S1 textural properties of TS-1-H<sub>R</sub> and TS-1-H<sub>S</sub> synthesized with different addition amount of Triton X-100.

| samples                | $S_{\text{BET}}$<br>(m <sup>2</sup> /g) <sup>a</sup> | $S_{\text{micro}}$<br>(m <sup>2</sup> /g) <sup>b</sup> | $S_{\text{ext}}$<br>(m <sup>2</sup> /g) <sup>b</sup> | $V_{\text{micro}}$<br>(cm <sup>3</sup> /g) <sup>b</sup> | $V_{\text{meso}}$<br>(cm <sup>3</sup> /g) <sup>c</sup> |
|------------------------|------------------------------------------------------|--------------------------------------------------------|------------------------------------------------------|---------------------------------------------------------|--------------------------------------------------------|
| TS-1-H <sub>S</sub> -A | 406                                                  | 296                                                    | 110                                                  | 0.15                                                    | 0.29                                                   |
| TS-1-H <sub>S</sub> -B | 414                                                  | 292                                                    | 122                                                  | 0.14                                                    | 0.30                                                   |
| TS-1-H <sub>S</sub> -C | 430                                                  | 260                                                    | 170                                                  | 0.12                                                    | 0.38                                                   |
| TS-1-H <sub>R</sub> -A | 414                                                  | 300                                                    | 114                                                  | 0.15                                                    | 0.30                                                   |
| TS-1-H <sub>R</sub> -B | 429                                                  | 295                                                    | 134                                                  | 0.14                                                    | 0.32                                                   |
| TS-1-H <sub>R</sub> -C | 455                                                  | 289                                                    | 166                                                  | 0.14                                                    | 0.38                                                   |

A, B, C refer to Triton X-100 to SiO<sub>2</sub> molar ratio of 0.102, 0.204 and 0.408, respectively. a.  $S_{\text{BET}}$  (total surface area) calculated using the BET method; b.  $S_{\text{micro}}$  (micropore area),  $S_{\text{ext}}$  (external surface area) and  $V_{\text{micro}}$  (micropore volume) calculated using the t-plot method; c.  $V_{\text{meso}}$  (mesopore volume) calculated using the BJH method (from adsorption).

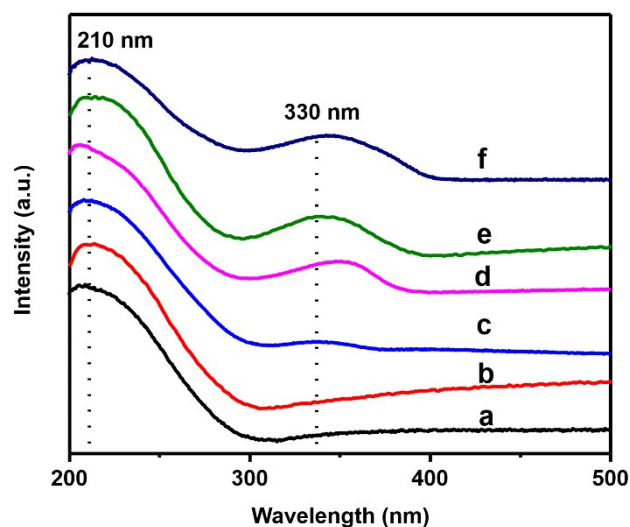

Fig. S2 UV/Vis spectra of TS-1-H<sub>R</sub> (a, b, c) and TS-1-H<sub>S</sub> (d, e, f) synthesized with Triton X-100 to SiO<sub>2</sub> molar ratio of 0.102, 0.204 and 0.408, respectively.

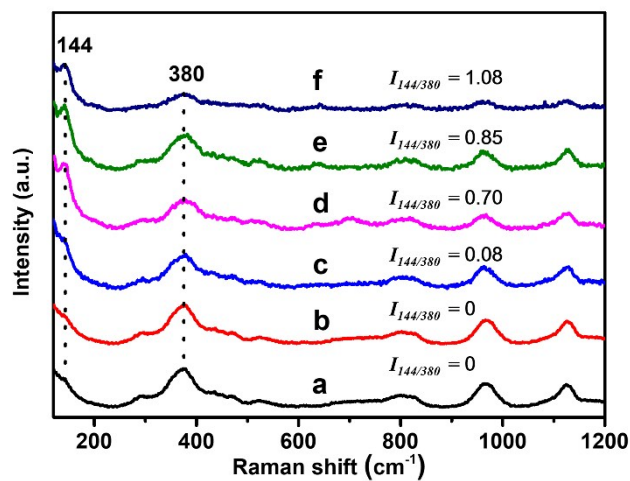

Fig. S3 UV-Raman spectra of TS-1-H<sub>R</sub> (a, b, c) and TS-1-H<sub>S</sub> (d, e, f) synthesized with Triton X-100 to SiO<sub>2</sub> molar ratio of 0.102, 0.204 and 0.408, respectively.  $I_{144/380}$  is used to estimate the content of anatase TiO<sub>2</sub>. The wavelength of the excitation light is 320 nm.

Table S2 Epoxidation of various alkenes over different TS-1 samples

|                           | allyl chloride |          | 1-heptene |          | cyclopentene |          |
|---------------------------|----------------|----------|-----------|----------|--------------|----------|
|                           | Conv. (%)      | Sel. (%) | Conv. (%) | Sel. (%) | Conv. (%)    | Sel. (%) |
| <b>TS-1-C</b>             | 27.7           | 100      | 12.2      | 99.5     | 23.8         | 100      |
| <b>TS-1-N</b>             | 66.9           | 96.1     | 30.3      | 98.1     | 33.7         | 99.0     |
| <b>TS-1-H<sub>s</sub></b> | 63.7           | 94.3     | 36.1      | 98.4     | 40.2         | 97.7     |
| <b>TS-1-H<sub>R</sub></b> | 70.6           | 96.9     | 51.3      | 99.1     | 50.3         | 98.5     |

Reaction conditions: cat., 50 mg; alkenes, 10 mmol; H<sub>2</sub>O<sub>2</sub> (30 wt%), 10 mmol; CH<sub>3</sub>OH, 10 mL; temp., 333 K; time, 2 h.

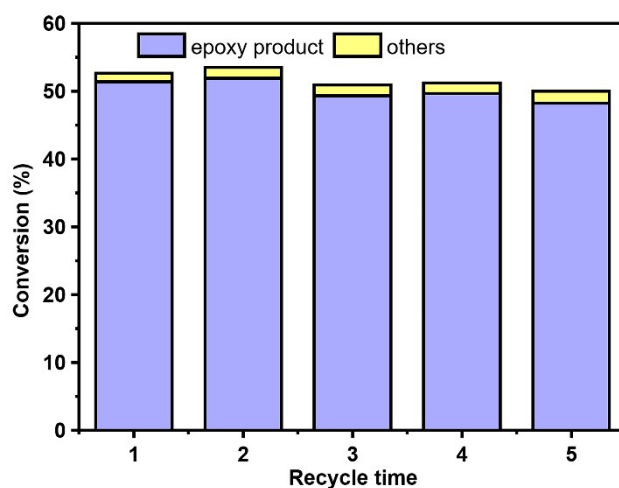

Fig. S4 Recycling tests of TS-1-H<sub>R</sub> as catalyst for epoxidation of 1-hexene  
 Reaction conditions: cat., 50 mg; 1-hexene, 10 mmol; H<sub>2</sub>O<sub>2</sub> (30 wt%), 10 mmol;  
 CH<sub>3</sub>OH, 10 mL; temp., 333 K; time, 2 h.

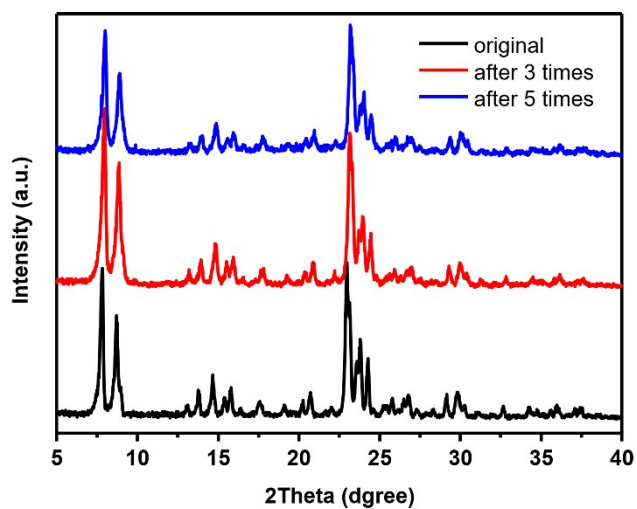

Fig. S5 XRD patterns of TS-1-H<sub>R</sub> in recycling test

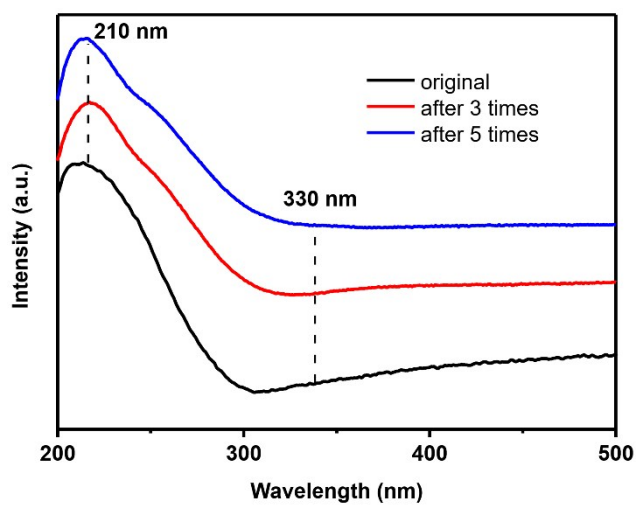

Fig. S6 UV/Vis spectra of TS-1-H<sub>R</sub> in recycling test
